# Supplementary material for: Melanoma NOS1 expression promotes dysfunctional IFN signaling
Source: JCI journal article supplement (doi:10.1172/jci69611), 2014-04-01
Supplement: sd1 [file 1]

***1. Supplemental figures:***

***Supplemental 15***

***Supplemental Figure1***

***Supplemental Figure2***

***Supplemental Figure3***

***Supplemental Figure4***

***Supplemental Figure5***

***Supplemental Figure6***

***Supplemental Figure7***

***Supplemental Figure8***

***Supplemental Figure9***

***Supplemental Figure10***

***Supplemental Figure11***

***Supplemental Figure12***

***Supplemental Figure13***

***Supplemental Figure14***

***2. Supplemental tables:***

***Supplemental Table1***

***Supplemental Table2***

***Supplemental Table3***

***Supplemental Table4***

***3. Supplemental Methods:***

***Patients and samples used for in vivo analysis of melanoma metastases.***

## 1. Supplemental Figures:

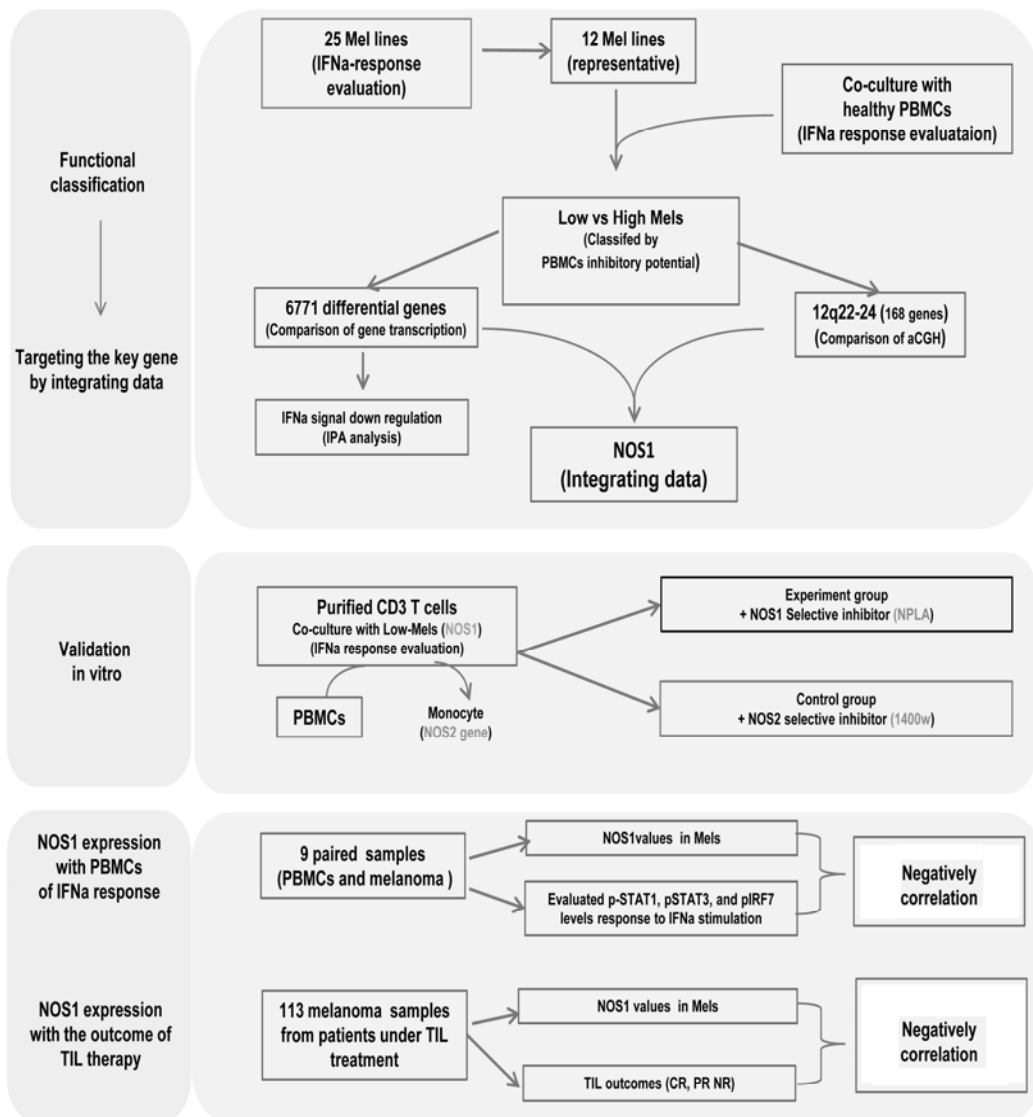

***Supplemental Figure15: Study Workflow***

**Top panel:** Integrating analysis of immune inhibitory melanoma-cells (Low-Mels) compared to non-inhibitory melanoma-cells (High-Mels). 12 melanoma cell lines selected from 25 lines representative of heterogeneity in IFN- $\alpha$ -pSTAT1 levels were co-cultured with healthy peripheral blood mononuclear cells (PBMCs). The 12 cell lines were classified into Low and High-mels according to their inhibitory potential for IFN- $\alpha$ -pSTAT1 in co-culture PBMCs. Comparison of gene transcription and aCGH data was conducted on Low and High-mels. Data analysis identified *NOS1* as the candidate determinant of immune inhibitory function in Low-Mels. Differential expressed genes by IPA-analysis suggested down-regulation of IFN $\alpha$  signaling in Low-mels. **Middle panel:** Validation of *NOS1* as the factor for the inhibitory function of Low-Mels. Purified CD3+T-cells were co-cultured with Low-Mels in the presence of a NOS1 selective inhibitor (NPLA) compared a control group culture in the presence of no inhibition of the NOS2 selective inhibitor (1400W). Only NPLA reversed purified CD3+T-cells from Low-mels inhibition but not 1400W. **Lower panel:** The data from patients. Correlation of NOS1 expression levels in melanoma with PBMCs response to IFN- $\alpha$  in 9 melanoma patients and correlation of NOS1 expression levels in melanoma with outcome to immunotherapy by adoptive tumor infiltrating lymphocytes (TILs).

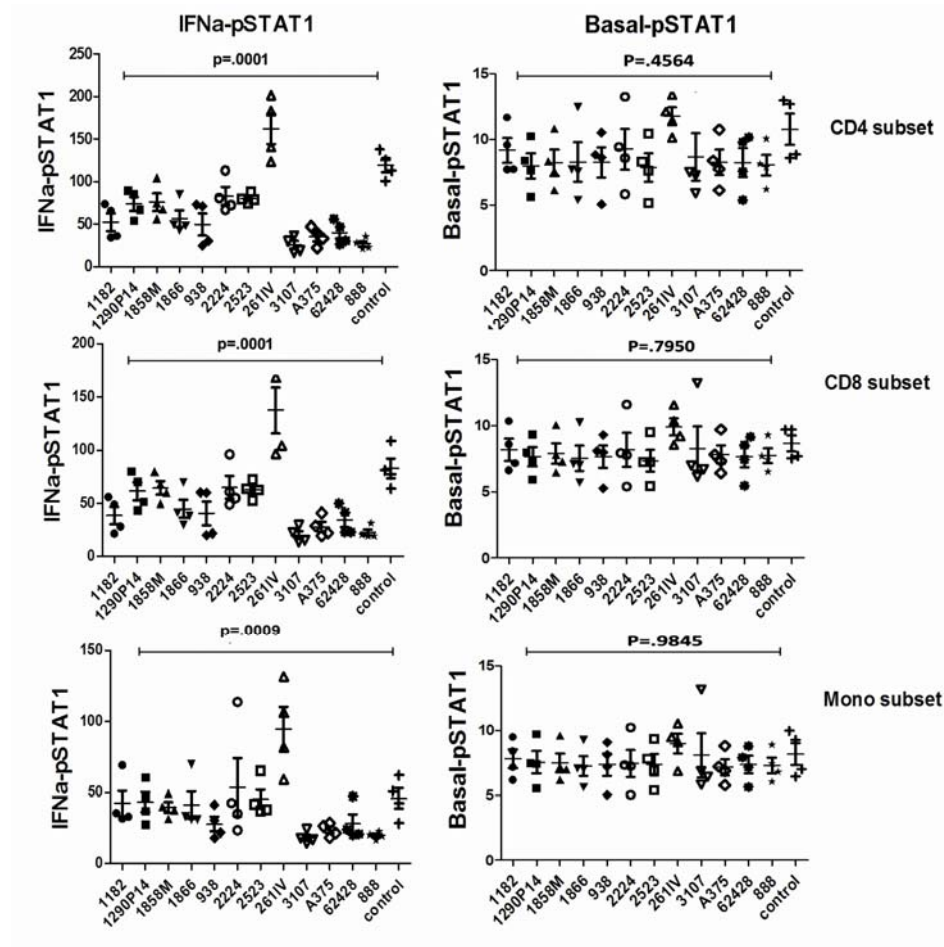

**Supplemental Figure 1**

**The levels of IFN- $\alpha$ -pSTAT1 but not basal-pSTAT1 of PBMC was altered by melanoma cell lines**

IFN- $\alpha$ -pSTAT1 in PBMCs subsets varied among co-cultured cell lines (P values = .0001, .0001 and .0009 for IFN- $\alpha$ -pSTAT1 in CD4<sup>+</sup>, CD8<sup>+</sup> T, and monocytes subsets; Kruskal Wallis ANOVA), but not basal-pSTAT1 (P values = .46, .80, .99 for CD4<sup>+</sup>, CD8<sup>+</sup> T, and monocytes subsets; Kruskal Wallis ANOVA);

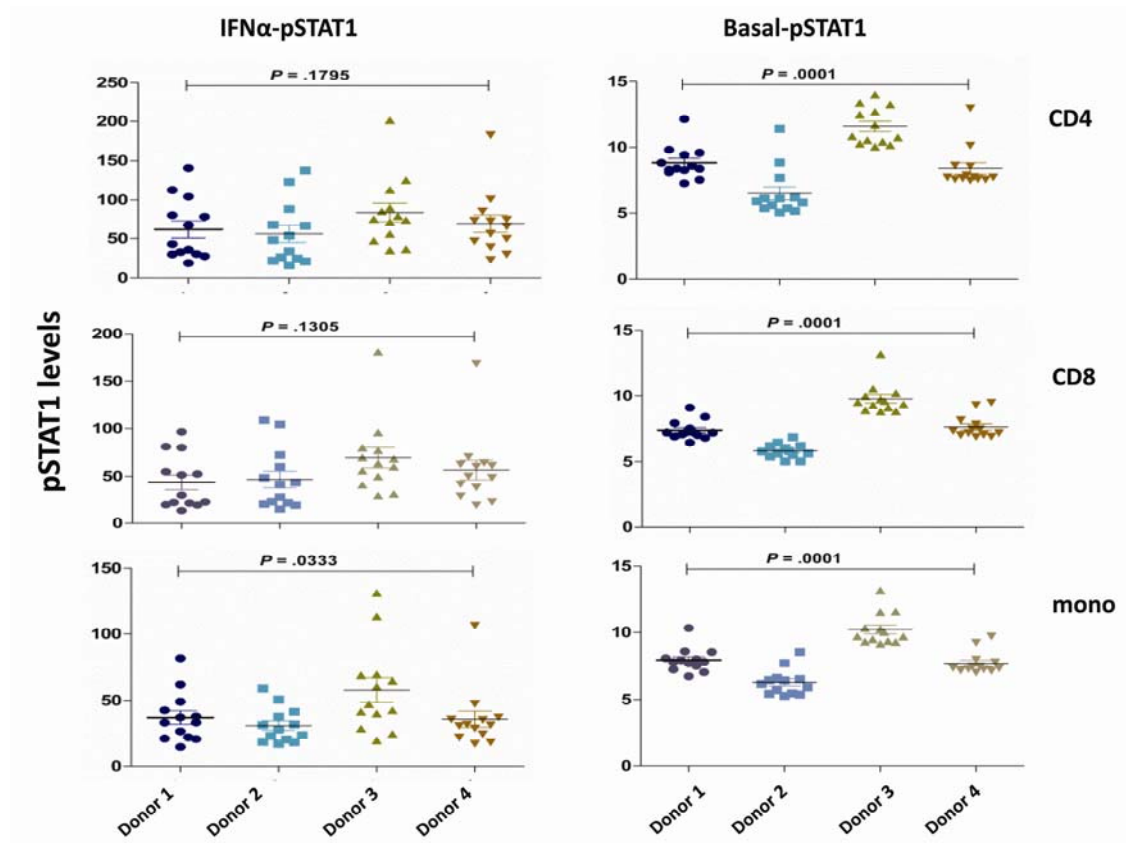

**Supplemental Figure2**

***The basal-pSTAT1 but not IFNα-pSTAT1 ofPBMC subsets varies among independent blood donors.***

Basal-pSTAT1 in CD4<sup>+</sup>, CD8<sup>+</sup> and monocytes subsets differed among 4 donors (P = .0001 all the three subsets), but IFN-α-pSTAT1 in CD4<sup>+</sup> and CD8<sup>+</sup> T cells not did (P = .12, .13) and IFN-α-pSTAT1in monocytes varied mildly (P = .03, Kruskal-Wallis ANOVA).

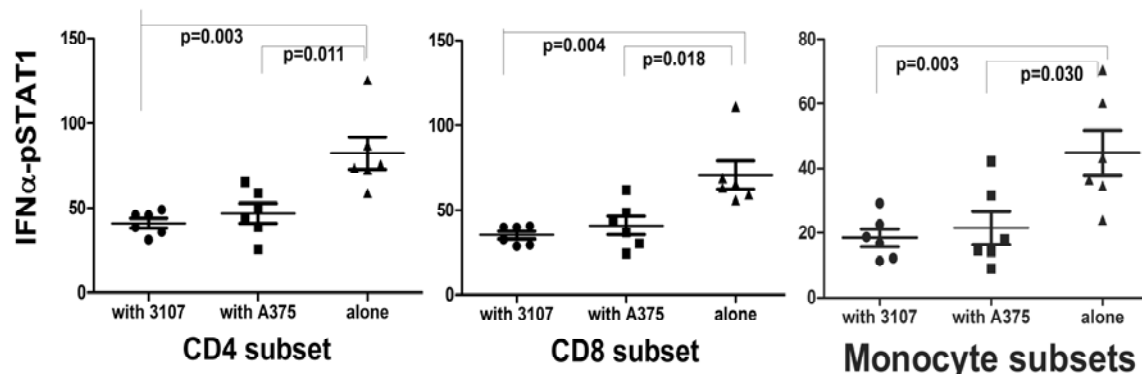

### ***Supplemental Figure3***

***Inhibition of PBMCs' IFNα-pSTAT1 levels by melanoma when maintained in autologous serum.***

CD4<sup>+</sup> (Left), CD8<sup>+</sup> (Middle) T cells and monocytes (Right) co-cultured with L-mels of 3107 and A375 when maintained in autologous serum; comparable reduction of responsiveness to IFN-α stimulation was observed (Paired T test, p-values = 0.003, 0.011 for CD4<sup>+</sup>, 0.004, 0.018 for CD8<sup>+</sup> and 0.003, 0.03 for monocyte subsets by 3107 and A375 respectively ).

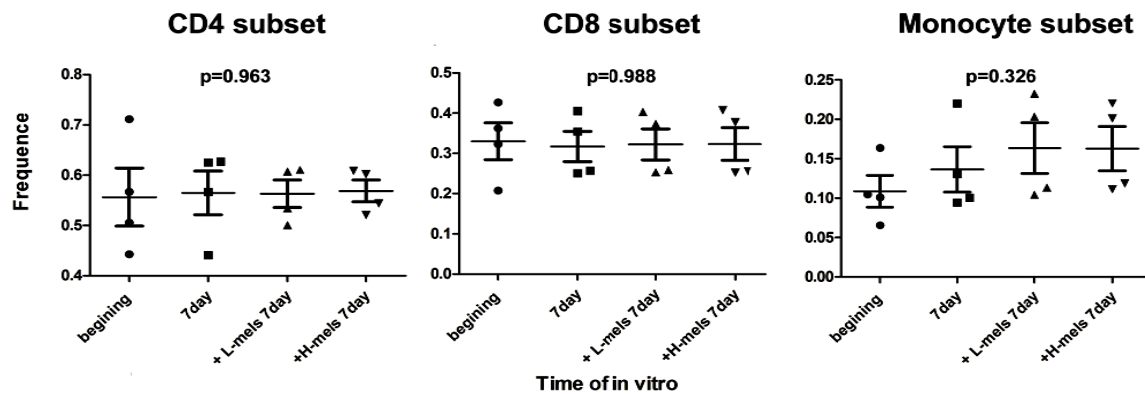

#### ***Supplemental Figure4***

##### ***Frequency of PBMC subsets was not altered by co-culture with melanoma cells***

No significant changes were observed comparing starting conditions with frequencies after 7-day in vitro culture whether the PBMCs had been co-cultured with L-mels or alone (Kruskal Wallis ANOVA.  $P= 0.287, 0.955, 0.376$  for  $CD4^+$ ,  $CD8^+$  and monocytes respectively)

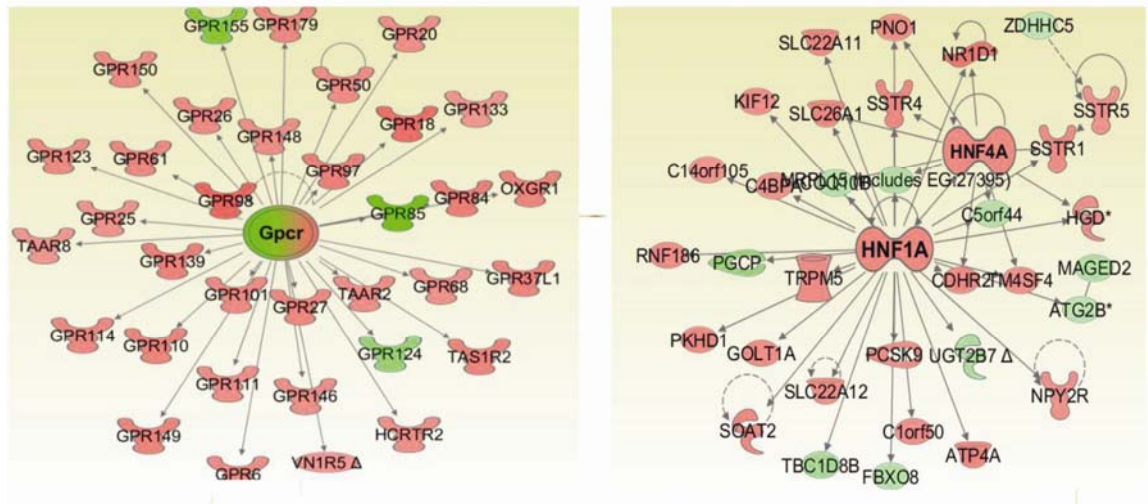

### ***Supplemental Figure5***

#### ***Activity of G-protein coupled receptor/ STAT3 downstream signaling pathways in the L-mel-signature***

Up-regulation of G-coupled receptors (left) and downstream transcript factors (right) in the L-mel signature; analysis by IPA.

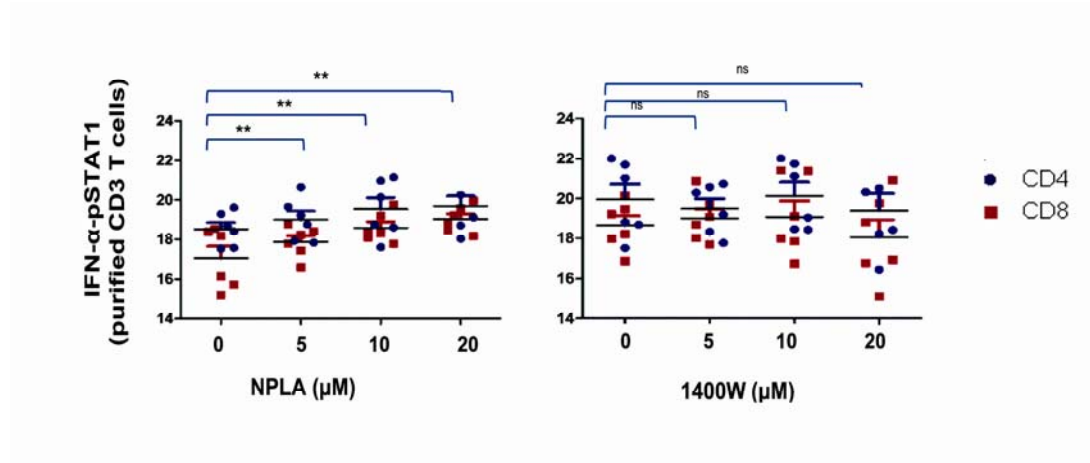

### Supplemental Figure6

#### *Restoration of IFN-α-pSTAT1 levels in purified CD3<sup>+</sup> T cells by NOS1 inhibitor but not NOS2 inhibitor*

Suppression of IFN-α-pSTAT1 levels in purified CD3<sup>+</sup> T cells was reversed by NPLA at minimal concentrations (5 μM, 10 μM, 20 μM,  $P = .0024, .0034, .0024$ , **Left**). In contrast, the NOS2-specific inhibitor 1400W did not affect significantly IFN-α-pSTAT1 in the same conditions (**Right**).

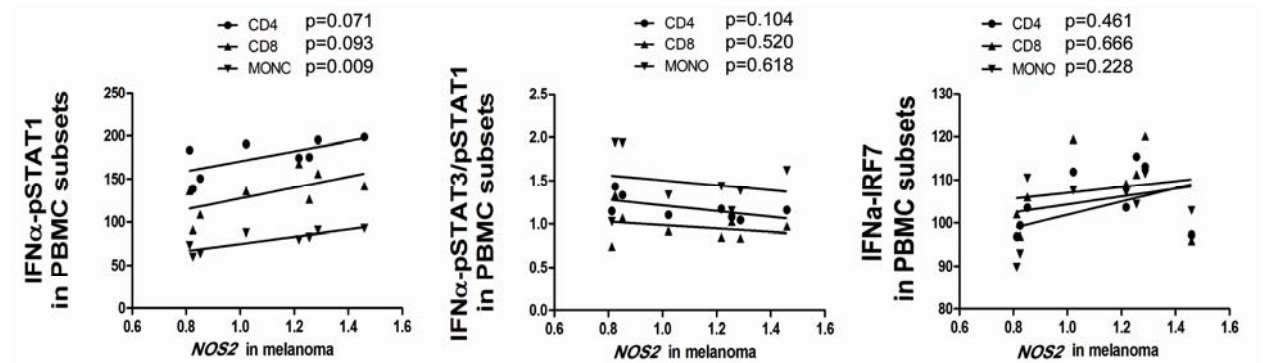

### Supplemental Figure7

*Analyzing the extent of correlation between IFN- $\alpha$ -pSTAT1 in PBMC subsets with in vivo NOS2 expression in paired melanoma metastases.*

Left: *NOS2* expressions did not correlate with IFN- $\alpha$ -pSTAT1 in CD4<sup>+</sup> and CD8<sup>+</sup> subsets, but positively correlated in monocytes (Pearson *r*; *p* = 0.0706, 0, 0.0926, 0.0091). No correlation between *NOS2* expression and IFN- $\alpha$ -pSTAT3/1 or IFN- $\alpha$ -pIRF7 in all three subsets (*p* = 0.1044, 0.5197, 0.6175 for IFN- $\alpha$ -pSTAT3/1; *p* = 0.4597, 0.6657, 0.2282 for IRF7 by CD4<sup>+</sup>, CD8<sup>+</sup> and monocyte subsets respectively).

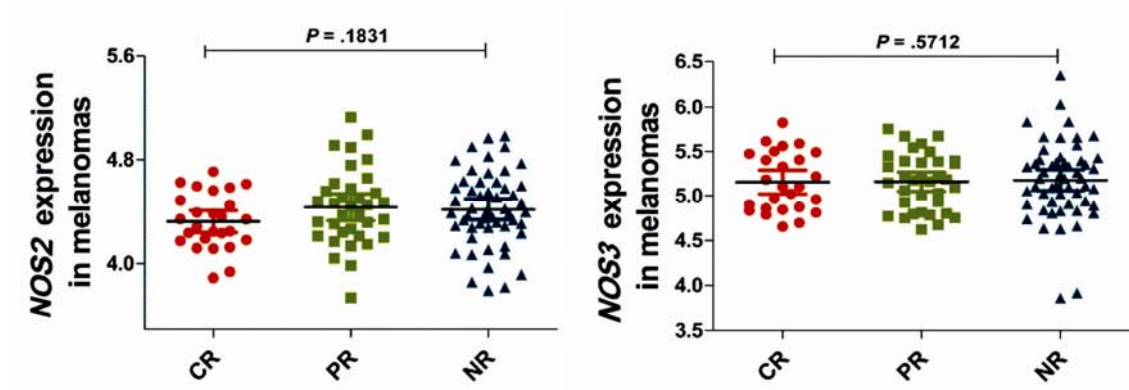

### *SupplementalFigure8*

*Expression of NOS2 and NOS3 in melanoma metastases did not correlate with the outcome of TIL therapy.*

Expressions of NOS2 (**Left**) and NOS3 (**Right**) are not significantly different among 113 metastases from patients experiencing CR, PR, and NR following adoptive TIL therapy (CR = complete response, PR = partial response and NR = Non response (P = .1831 and .5712 for NOS2 and NOS3 respectively, one way ANOVA).

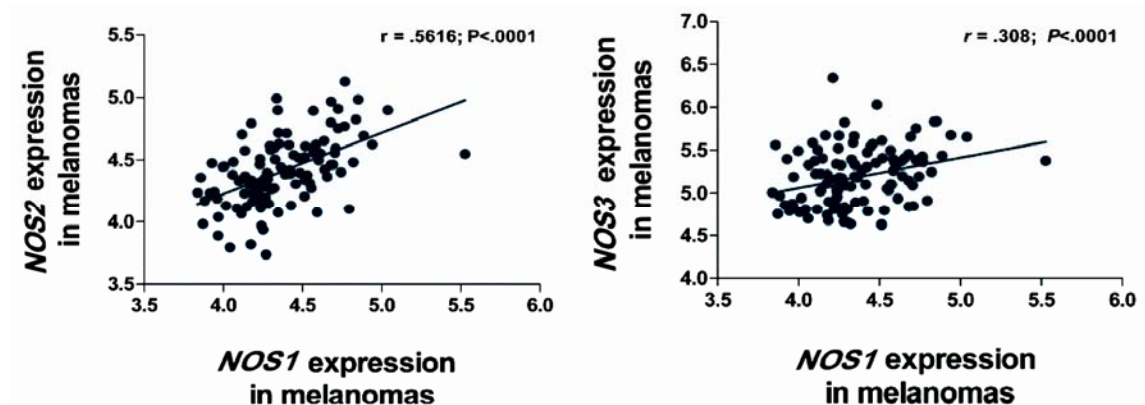

### ***Supplemental Figure9***

#### ***Correlating NOS1 expression to NOS2 and NOS3 in melanoma metastases***

*NOS1* expression was correlated with *NOS2* (**Left**) and *NOS3* (**Right**) ( $r = 0.5616, 0.308$ ,  $P = 0.0000, 0.0009$  for *NOS2* and *NOS3*, Spearman's correlation).

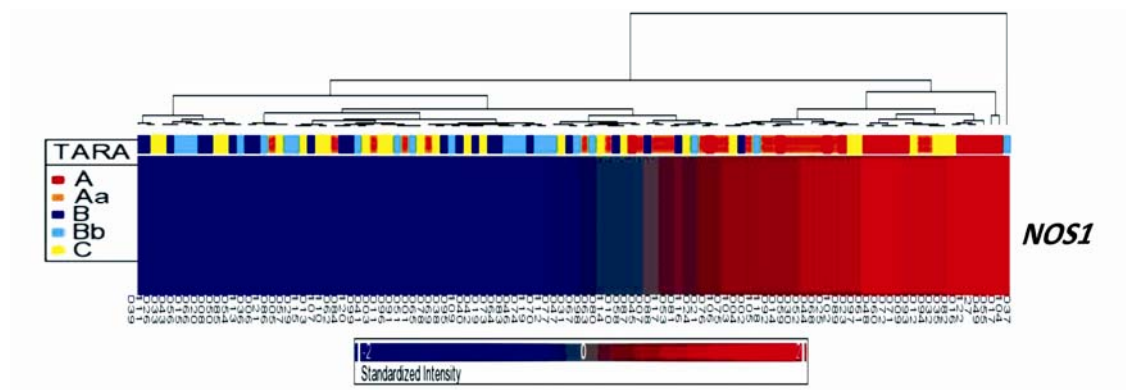

### ***Supplemental Figure10***

#### ***NOS1 expression in melanoma metastases correlates with TARA class.***

Melanoma metastases were characterized according to the recently described TARA classification (Spivey *et al.* BMC Genomics 2012). TARA class A and Aa corresponds to a poor prognosis cancer phenotype characterized by an enrichment of Th17 signature.

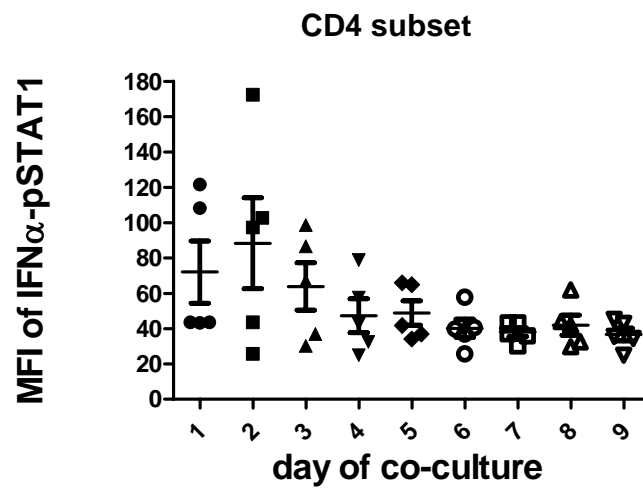

***Supplemental Figure 11***

***Time course analysis of IFNα-pSTAT1 in CD4<sup>+</sup> T cells when co-cultured with melanoma L-mel624***

CD4<sup>+</sup> T cells' STAT1 phosphorylation levels are shown (n=5) during co-culture with the melanoma cell line L-mel624.

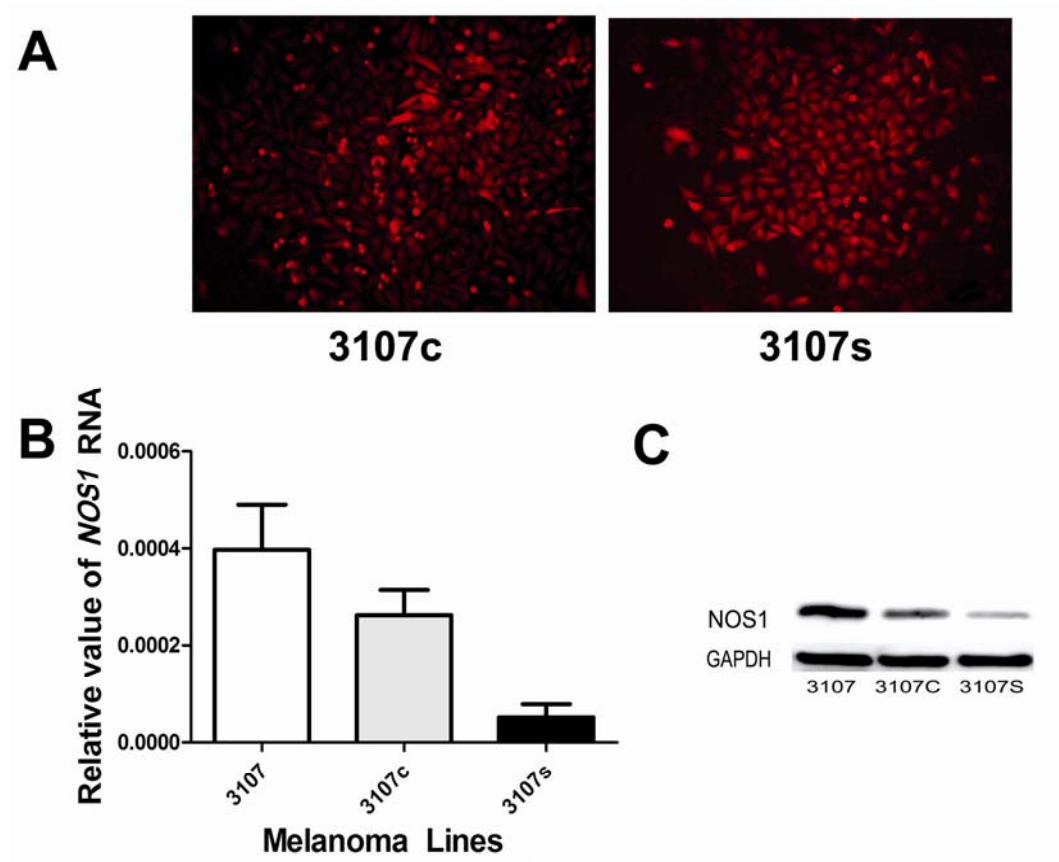

**Supplemental Figure12**

**Genetic knockdown of NOS1 in the strongly inhibitory L-mel 3107 cell line.**

A) The image of NOS1 shRNA clone of L-mel 3107 (3107s) and its control clone (3107c). B). Relative value of *NOS1* RNA in 3107, 3107c and 3107s clones as assessed by real-time PCR. C) Western blotting image for NOS1 protein in 3107, 3107c and 3107s clones.

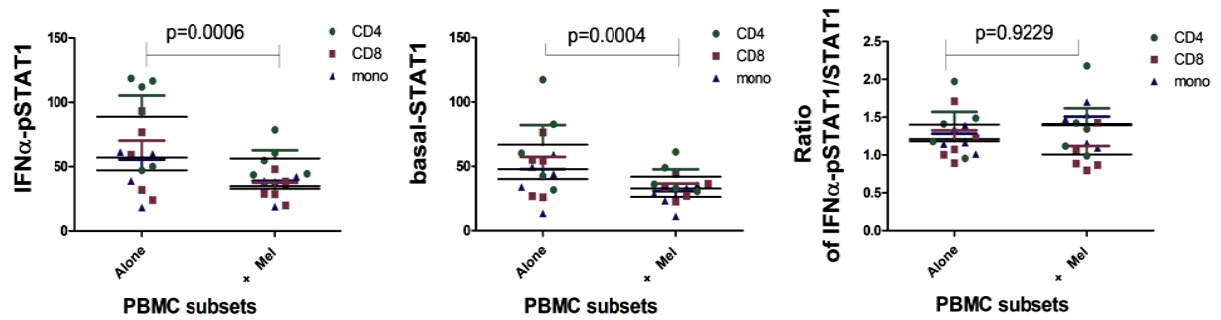

**Supplemental Figure 13**

***Comparison of IFNα-pSTAT1 and basal-STAT1 protein levels and of IFNα-pSTAT1/STAT1 in PBMCs from five healthy donors***

Comparisons were made between T cells co-cultured with L-mel 624 and alone. IFNα-pSTAT1 (left) and STAT1 (middle) in PBMCs subsets reduced significantly by co-culture with melanoma line 62428 (Paired t test,  $p=0.0006$  and  $0.0004$ , for IFNα-pSTAT1 and STAT1 respectively); but not in the ratio of IFNα-pSTAT1/STAT1 (Right,  $p=0.5229$ ).

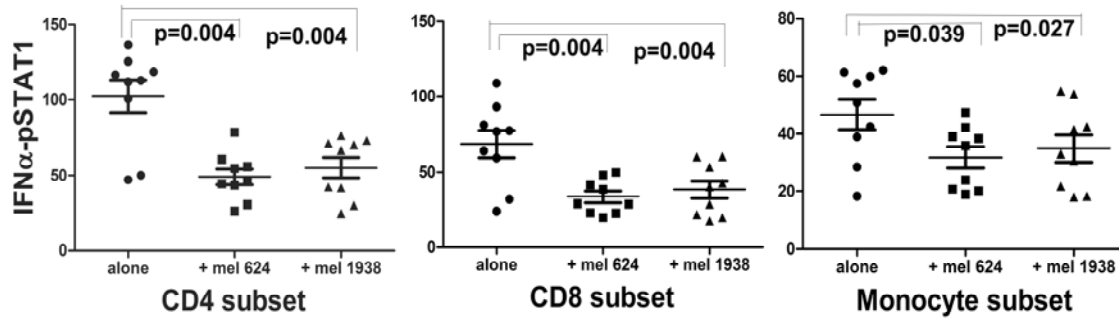

#### ***Supplemental Figure 14***

***Inhibitory role of melanoma cells on PBMCs' IFNα-pSTAT1 levels when analyzing CD4<sup>+</sup>, CD8<sup>+</sup> and monocyte subsets separately.***

Inhibition of IFNα-pSTAT1 in PBMCs subsets by L-mels also were significant when analyzed individually on CD4<sup>+</sup> (Left), CD8<sup>+</sup> (Middle), and monocytes (Right) subsets (Paired T test, p=0.004, 0.004 for CD4<sup>+</sup>, 0.004, 0.004 for CD8<sup>+</sup> and 0.039, 0.027 for monocyte subsets by L-mel 62428 and 1938 respectively). (n=9)

## 2. Supplemental Tables:

### Supplemental Table1

Transcription factors predicted to be inhibited in the L-melsignature (IPA, z –score <-2)

| Transcription  | Predicted        |                    |
|----------------|------------------|--------------------|
| Regulator      | Activation State | Regulation z-score |
| XBP1 (includes |                  |                    |
| EG:140614)     | Inhibited        | -5.045             |
| TFEB           | Inhibited        | -3.383             |
| IRF7           | Inhibited        | -3.253             |
| Nfat (family)  | Inhibited        | -2.963             |
| MITF           | Inhibited        | -2.92              |
| IRF5           | Inhibited        | -2.668             |
| NFE2L2         | Inhibited        | -2.487             |
| PRDM1          | Inhibited        | -2.475             |
| HIC1           | Inhibited        | -2.446             |
| STAT1          | Inhibited        | -2.184             |
| YY1            | Inhibited        | -2.177             |
| E2F1           | Inhibited        | -2.159             |
| STAT4          | Inhibited        | -2.15              |
| SF1 (includes  |                  |                    |
| EG:15499)      | Inhibited        | -2.132             |

***Supplemental Table2:***

Predicted status of STAT3 targets in the L-melsignature (by IPA, z –score <-2)

| Genes   | Fold Change | Genes   | Fold Change |
|---------|-------------|---------|-------------|
| TERT    | 1.755       | TNFSF11 | 1.216       |
| ISG20   | 1.727       | NPPA    | 1.208       |
| SALL4   | 1.702       | NPY     | 1.208       |
| IGF1R   | 1.515       | POU5F1  | 1.194       |
| CD40LG  | 1.402       | LILRB4  | 1.193       |
| ESR2    | 1.375       | IL17F   | 1.193       |
| C5AR1   | 1.372       | REG1B   | 1.192       |
| ALAS2   | 1.304       | TBX21   | 1.18        |
| APOA4   | 1.302       | OMP     | 1.174       |
| TRH     | 1.275       | REN     | 1.159       |
| LIF     | 1.264       | FGA     | 1.157       |
| IGFBP1  | 1.26        | ITGB2   | 1.153       |
| AGRP    | 1.258       | CDH5    | 1.152       |
| GFAP    | 1.253       | HAMP    | 1.143       |
| PIM3    | 1.251       | ARG1    | 1.141       |
| CCL4    | 1.249       | CSN2    | 1.138       |
| CEBPA   | 1.236       | IL17A   | 1.125       |
| LILRB2  | 1.233       | CCR5    | 1.113       |
| HNF4A   | 1.225       | IL23R   | 1.11        |
| GADD45G | 1.225       | IL23A   | 1.109       |
| SFTPB   | 1.224       | FGB     | 1.109       |
| CCL17   | 1.224       | FGG     | 1.106       |
| CDKN2D  | 1.222       | VIP     | 1.099       |
| RORC    | 1.216       |         |             |

***Supplemental Table3:***

The nineteen genes of the 12q24 segment showing both frequent chromosomal amplification and up-regulated gene expression in L-mel cell lines

---

**Gene Symbols**

---

B3GNT4

FOXN4

MORN3

SETD8

CABP1

GPR109B

NOS1

SRRM4

CDK2AP1

HNF1A

OGFOD2

SUDS3

DNAH10

IL31

RNFT2

WSCD2

FAM101A

KSR2

SETD1B

---

***Supplemental Table 4:***

NOS1 copy number variation and mRNA levels in L-mel and H-mel cell lines

| <i>Cell line Name</i> | <i>group</i> | <i>L-RNA</i> | <i>NOS1 Copy number</i> |
|-----------------------|--------------|--------------|-------------------------|
| <i>A375</i>           | L-mels       | 6.16578      | Amplification           |
| <i>62428</i>          | L-mels       | 6.16594      | Amplification           |
| <i>888</i>            | L-mels       | 6.20363      | Amplification           |
| <i>938</i>            | L-mels       | 6.10864      | Amplification           |
| <i>3107</i>           | L-mels       | 6.19139      | Amplification           |
| <i>3104</i>           | L-mels       | 5.98086      | Unchanged               |
| <i>146II</i>          | L-mels       | 6.21428      | Unchanged               |
| <i>1858w</i>          | L-mels       | 6.22958      | Unchanged               |
| <i>2224</i>           | H-mels       | 5.95026      | Unchanged               |
| <i>2035</i>           | H-mels       | 5.91202      | Unchanged               |
| <i>1858M</i>          | H-mels       | 5.94316      | Unchanged               |
| <i>1290p14</i>        | H-mels       | 5.68613      | Unchanged               |
| <i>1195</i>           | H-mels       | 5.83637      | Unchanged               |
| <i>1866</i>           | H-mels       | 5.79502      | Unchanged               |
| <i>1858F</i>          | H-mels       | 5.89673      | Deletion                |
| <i>261IV</i>          | H-mels       | 5.66674      | Deletion                |
| <i>1182</i>           | H-mels       | 6.09607      | Deletion                |
| <i>2523</i>           | H-mels       | 6.03419      | Deletion                |

***3. Supplemental Methods:***

***Clinical samples – detailed description***

**Samples** 113 pre-treatment tumor biopsies were available for RNA extraction. Samples were collected during five consecutive trials at the Surgery Branch, National Cancer Institute (NCI) (Dudley *et al*, 2010; Rosenberg *et al*, 2011; Bedognetti *et al*, 2013) codified as: TNMA, T200, T1200, TYT, and TCD8. All patients had progressive disease and had previously received standard or experimental regimens. Fifty percent of the patients (71/142) achieved an objective response (OR), of which 25 (18%) experienced a durable complete response (CR) and 46 (32%) a partial response (PR). Tumor biopsy samples included 24 CR (21%), 34 PR (30%) and 55 (49%) non-response (NR) samples.

Two Gy or 12 Gy total body irradiation (TBI) was administered in conjunction with chemotherapy in T200 and T1200 trials, respectively (Rosenberg *et al*, 2011). A day following lymphodepletion, TILs were infused into patients and high-dose IL-2 therapy was started. Protocols employed to generate TILs are described elsewhere (Dudley *et al*, 2010; Dudley *et al*, 2003; Rosenberg *et al*, 2011; Tran *et al*, 2008). Before TIL administration, patients received a nonmyeloablativelymphodepleting regimen consisting of cyclophosphamide at 60 mg/Kg/d for 2 days and fludarabine at 25 mg/m<sup>2</sup>/d for 5 days (Dudley *et al*, 2010; Rosenberg *et al*, 2011). A day following lymphodepletion, TILs were infused into patients and high-dose IL-2 therapy was started (720,000 IU/Kg intravenously every 8 hours to tolerance). Major inclusion criteria included minimum age of 18 years, measurable disease, good clinical performance and life expectancy greater than 3 months. Detailed study protocols information are available elsewhere (<http://clinicaltrials.gov/ct2/show/NCT00513604?term=07C0176&rank=1>), (Dudley *et al*, 2010; Rosenberg *et al*, 2011). All patients signed an informed consent approved by the Institutional Review Board of the NCI. Data for this analysis are updated as of January 11,

2012. Response (CR, PR, or NR) was rated according to Response Evaluation Criteria in Solid Tumors (RECIST) guidelines 4 weeks following TIL administration and at regular intervals thereafter. A CR or PR was considered an OR and a PR or NR was considered a Non-CR.

**Gene expression analysis.** Total RNA was isolated from 142 TILs (cryopreserved just before the infusion into the patients) and 113 snap frozen tumor samples used for TIL generation. Total RNA was extracted with the QiagenmiRNeasy Mini kit and its quality tested with the Agilent Bioanalyzer 2000 (Agilent Technologies, Palo Alto, CA). Three hundred ng of total RNA was used for RNA amplification according to manufacturer's instructions (WT Expression Kit; Ambion, Austin, TX). aRNA were reverse transcribed into cDNAs followed by fragmentation. After hybridization to the GeneChip Human Gene 1.0 ST Arrays, the chips were labeled with a WT Terminal Labeling Kit (Affymetrix, Santa Clara, CA) and scanned on a GeneChip Scanner 3000 7G (Affymetrix, Santa Clara, CA). Data were normalized using the Robust Multi-Chip Average (RMA) method and Log<sub>2</sub> transformed using Partek Genomics Suite 6.4 (Partek Inc., St. Louis, MO). Data analyses were based on the whole transcripts.

**Statistical analysis.** See in the manuscript.
